# Supplementary material for: CYP3A5*3 and SLCO1B1 c.521T>C Polymorphisms Influence the Pharmacokinetics of Atorvastatin and 2-Hydroxy Atorvastatin
Source: MDPI journal article supplement (doi:10.3390/pharmaceutics14071491), 2022-07-18
Supplement: s1 [file s1]

**Table S1.** Accuracy and precision of atorvastatin and 2-OH atorvastatin in plasma.

| Concentration (ng/mL) | Accuracy (%)      |           | Precision (%) |           |
|-----------------------|-------------------|-----------|---------------|-----------|
|                       | Intra-day         | Inter-day | Intra-day     | Inter-day |
|                       | Atorvastatin      |           |               |           |
| 0.2 (LLOQ)            | 104.7             | 101.3     | 6.3           | 4.4       |
| 5                     | 100.9             | 103.4     | 4.6           | 1.3       |
| 100                   | 99.9              | 98.6      | 3.3           | 3.3       |
| 200                   | 93.0              | 96.5      | 3.6           | 3.8       |
|                       | 2-OH atorvastatin |           |               |           |
| 0.2 (LLOQ)            | 104.7             | 100.5     | 3.4           | 5.4       |
| 5                     | 97.2              | 101.3     | 4.7           | 2.5       |
| 100                   | 100.9             | 100.4     | 2.8           | 3.1       |
| 200                   | 96.3              | 98.6      | 3.9           | 2.5       |

LLOQ, lower limit of quantification.

**Table S2.** Stability of atorvastatin and 2-OH atorvastatin in plasma.

| Stability         | Storage condition      | Concentration (ng/mL) | Remained (%) |
|-------------------|------------------------|-----------------------|--------------|
| Atorvastatin      |                        |                       |              |
| Short-Term        | 6 hr, room temperature | 0.5                   | 100.8 ± 4.8  |
|                   |                        | 200                   | 101.1 ± 5.8  |
| Freeze and Thaw   | 4 cycles, -80 °C       | 0.5                   | 104.2 ± 4.1  |
|                   |                        | 200                   | 102.8 ± 3.6  |
| Autosampler       | 36 hr, 4 °C            | 0.5                   | 102.2 ± 1.9  |
|                   |                        | 200                   | 96.5 ± 0.8   |
| Long-Term         | 1 week, -80 °C         | 0.5                   | 102.8 ± 5.6  |
|                   |                        | 200                   | 103.5 ± 5.2  |
| 2-OH atorvastatin |                        |                       |              |
| Short-Term        | 6 hr, room temperature | 0.5                   | 97.3 ± 7.7   |
|                   |                        | 200                   | 102.0 ± 4.3  |
| Freeze and Thaw   | 4 cycles, -80 °C       | 0.5                   | 105.9 ± 6.1  |
|                   |                        | 200                   | 104.0 ± 9.1  |
| Autosampler       | 36 hr, 4 °C            | 0.5                   | 108.1 ± 0.4  |
|                   |                        | 200                   | 103.1 ± 1.7  |
| Long-Term         | 1 week, -80 °C         | 0.5                   | 100.9 ± 2.8  |
|                   |                        | 200                   | 99.8 ± 2.4   |

Data are expressed as mean ± SD.

**Table S3.** Demographic data.

|                         | genotype | <i>n</i> | Age<br>(years) | Height<br>(cm) | Bodyweight<br>(kg) | BMI<br>(kg/m <sup>2</sup> ) |
|-------------------------|----------|----------|----------------|----------------|--------------------|-----------------------------|
| <i>CYP3A5</i>           | *1/*1    | 3        | 26.0 ± 1.7     | 176.0 ± 5.2    | 71.3 ± 3.1         | 23.0 ± 0.9                  |
|                         | *1/*3    | 22       | 23.9 ± 2.3     | 174.8 ± 3.8    | 70.9 ± 6.9         | 23.2 ± 1.8                  |
|                         | *3/*3    | 21       | 24.2 ± 2.6     | 176.5 ± 4.6    | 70.7 ± 7.3         | 22.6 ± 1.6                  |
| <i>SLCO1B1</i> c.388A>G | TT       | 6        | 23.7 ± 0.5     | 174.5 ± 4.2    | 66.5 ± 4.8         | 21.8 ± 1.5                  |
|                         | TC       | 14       | 23.2 ± 2.9     | 175.1 ± 4.3    | 71.4 ± 7           | 23.3 ± 1.9                  |
|                         | CC       | 26       | 24.8 ± 2.3     | 176.2 ± 4.3    | 71.5 ± 6.9         | 23.0 ± 1.5                  |
| <i>SLCO1B1</i> c.521T>C | AA       | 1        | 23             | 176            | 67                 | 21.6                        |
|                         | AG       | 12       | 23.1 ± 2.3     | 176.5 ± 4.7    | 71.8 ± 6.3         | 23.0 ± 1.4                  |
|                         | GG       | 33       | 24.6 ± 2.4     | 175.3 ± 4.2    | 70.6 ± 7.1         | 22.9 ± 1.8                  |

Data are expressed as mean ± SD.

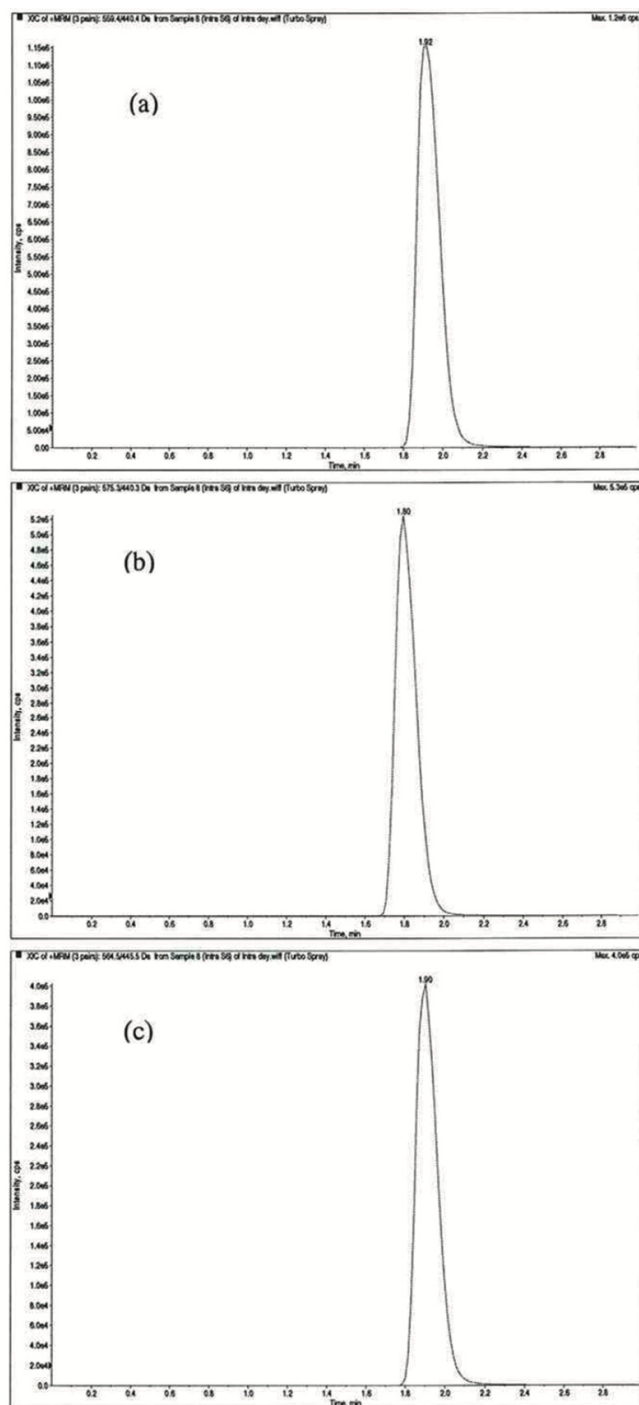

**Figure S1.** Representative chromatograms of 200 ng/mL of atorvastatin (a), 200 ng/mL of 2-OH atorvastatin (b), and 200 ng/mL of atorvastatin-d5 (c).
